# Supplementary material for: Three-dimensional micropatterning of semiconducting polymers via capillary force-assisted evaporative self-assembly
Source: Royal Society of Chemistry journal article supplement (doi:10.1039/c9sm00478e), 2019-01-01
Supplement: c9sm00478e1.pdf [file c9sm00478e1.pdf]

## Supporting Information for

### Three-Dimensional Micropatterning of Semiconducting Polymers via Capillary Force-Assisted Evaporative Self-Assembly

Jae In Shin,<sup>1</sup> Su Jung Cho,<sup>1</sup> Jisoo Jeon,<sup>1</sup> Kwang Hee Lee,<sup>1</sup> Jeong Jae Wie<sup>1,2,\*</sup>

<sup>1</sup>Inha University, Department of Polymer Science and Engineering, Incheon 22212, South Korea

<sup>2</sup>World Class Smart Laboratory (WCSL), Inha University, Incheon 22212, South Korea

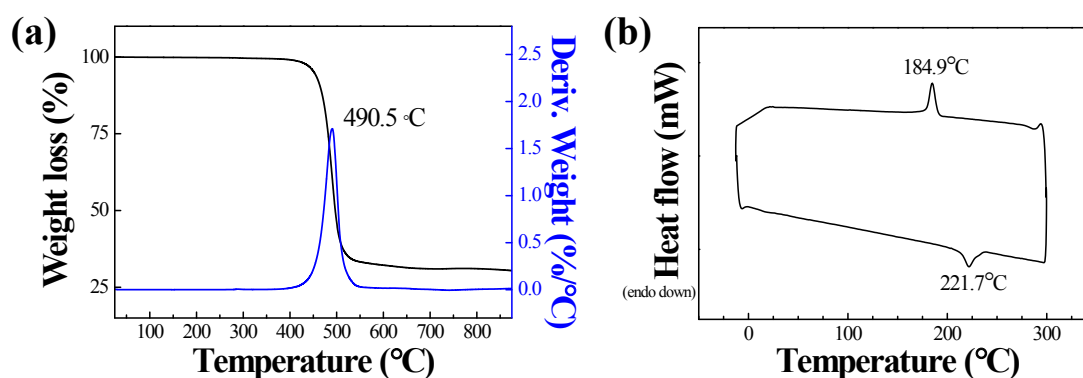

**Figure S1.** Thermal analysis of P3HT. (a) thermogravimetric analysis (TGA) of P3HT, (b) differential scanning calorimetry (DSC) analysis of P3HT

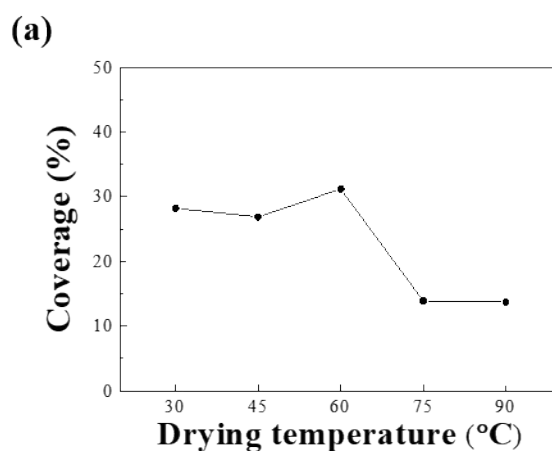

**Figure S2.** Surface coverage of Self-assembled P3HT micropatterns at different temperatures by image analysis.

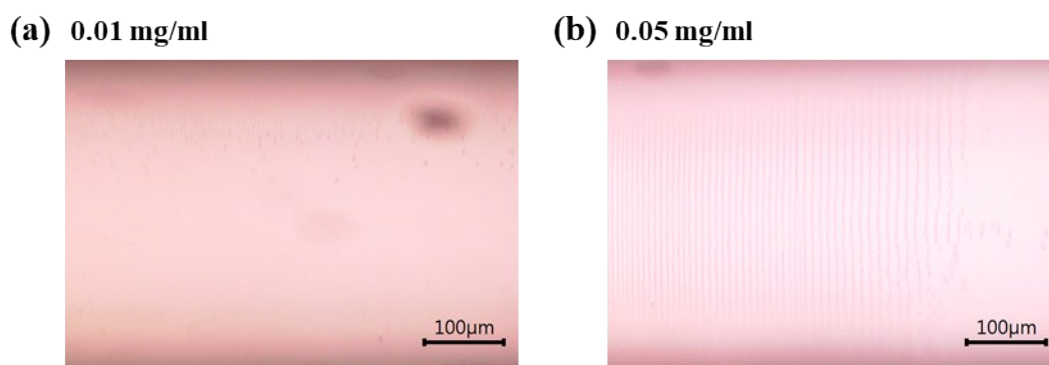

**Figure S3.** Self-assembled P3HT micropatterns from low P3HT concentrations. (a) 0.01 mg/ml, (b) 0.05 mg/ml

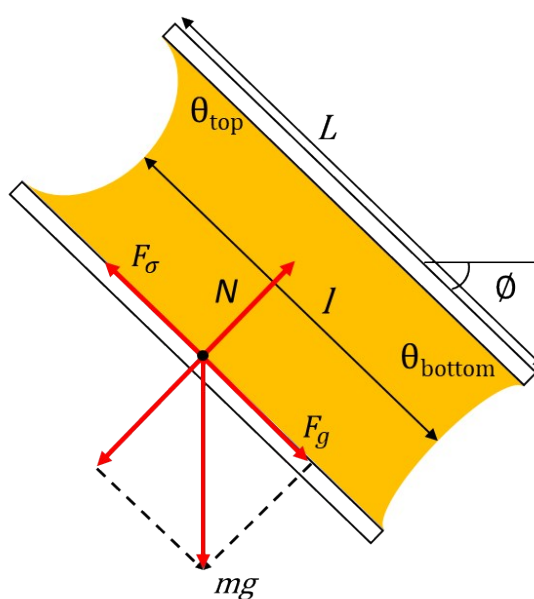

**Figure S4.** The scheme of the forces indicates acting inside the tilted capillary. ( $F_\sigma$ : Adhesive force,  $F_g$ : force due to gravitational force,  $N$ : normal force,  $\phi$ : tilt angle,  $\theta$ : contact angle,  $l$ : length of solution in capillary tube,  $L$ : length of capillary tube)

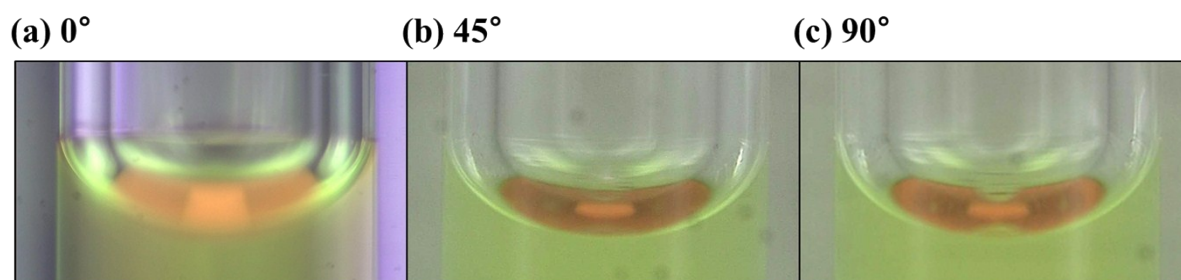

**Figure S5.** Contact angle of the P3HT solution in the capillary tubes. (a)  $0^\circ$  tilted capillary tube, (b)  $45^\circ$  tilted capillary tube, (c)  $90^\circ$  tilted capillary tube)

**Supplementary videos**

Supplementary video 1. In-situ monitoring of 3D ring-like P3HT micropatterns formation by optical microscopy

Supplementary video 2. Stick and slip steps of evaporative self-assembly of P3HT by high-speed camera
